1

1 **The Role of Toll-like receptor 4 in respiratory syncytial virus replication,**  
2 **interferon lambda 1 induction, and chemokine responses.**

3

4

5

6 **Lindsay Broadbent<sup>1</sup>, Jonathon D. Coey<sup>1</sup>, Michael D. Shields<sup>1,2</sup>, Ultan F. Power<sup>1</sup>**

7

8 <sup>1</sup>Centre for Experimental Medicine, Queens University Belfast, 97 Lisburn Road,  
9 Belfast, Northern Ireland

10 <sup>2</sup>The Royal Belfast Hospital for Sick Children, Northern Ireland

11

12

13 **Running title: RSV infection induces type III IFN through a TLR-4 dependent**  
14 **pathway**

15

16 Corresponding address: Ultan F. Power, [u.power@qub.ac.uk](mailto:u.power@qub.ac.uk)

17

## 18 **Abstract**

19 Respiratory syncytial virus (RSV) infection is the leading cause of severe lower  
20 respiratory tract infections (LRTI) in infants worldwide. The immune responses to RSV  
21 infection are implicated in RSV pathogenesis but RSV immunopathogenesis in  
22 humans remains poorly understood. We previously demonstrated that IFN- $\lambda$ 1 is the  
23 principle interferon induced following RSV infection of infants and well-differentiated  
24 primary pediatric bronchial epithelial cells (WD-PBECs). Interestingly, RSV F interacts  
25 with the TLR4/CD14/MD2 complex to initiate secretion of pro-inflammatory cytokines,  
26 while TLR4 stimulation with house dust mite induces IFN- $\lambda$ 1 production. However, the  
27 role of TLR4 in RSV infection and concomitant IFN- $\lambda$ 1 induction remains unclear.  
28 Using our RSV/WD-PBEC infection model, we found that CLI-095 inhibition of TLR4  
29 resulted in significantly reduced viral growth kinetics, and secretion of IFN- $\lambda$ 1 and pro-  
30 inflammatory chemokines. To elucidate specific TLR4 signalling intermediates  
31 implicated in virus replication and innate immune responses we selected 4 inhibitors,  
32 including LY294002, U0126, SB203580 and JSH-23. SB203580, a p38 MAPK  
33 inhibitor, reduced both viral growth kinetics and IFN- $\lambda$ 1 secretion, while JSH-23, an  
34 NF- $\kappa$ B inhibitor, reduced IFN- $\lambda$ 1 secretion without affecting virus growth kinetics. Our  
35 data indicate that TLR4 plays a role in RSV entry and/or replication and IFN- $\lambda$ 1  
36 induction following RSV infection is mediated, in part, by TLR4 signalling through NF-  
37  $\kappa$ B and/or p38 MAPK. Therefore, targeting TLR4 or downstream effector proteins  
38 could present novel treatment strategies against RSV.

## 39 **Importance**

40 The role of TLR4 in RSV infection and IFN- $\lambda$ 1 induction is controversial. Using our  
41 WD-PBEC model, which replicates many hallmarks of RSV infection *in vivo*, we  
42 demonstrated that the TLR4 pathway is involved in both RSV infection and/or

43 replication and the concomitant induction of IFN- $\lambda$ 1 and other pro-inflammatory  
44 cytokines. Increasing our understanding of the role of TLR4 in RSV  
45 immunopathogenesis may lead to the development of novel RSV therapeutics.

46

## 47 **Introduction**

48 Respiratory syncytial virus (RSV) is responsible for approximately 3.4 million  
49 hospitalisations of infants each year and is the primary cause of severe lower  
50 respiratory tract infections (LRTI) in children worldwide(1, 2). There are currently no  
51 RSV vaccines or specific therapeutics available. The innate immune system provides  
52 an important first line of defence against RSV disease. Innate immune signalling  
53 pathways are initiated by the recognition of pathogen associated molecular patterns  
54 (PAMPs) by cell surface or intracellular pathogen recognition receptors (PRRs), such  
55 as Toll-like receptors (TLRs). Some TLRs are implicated in activating innate immune  
56 responses following RSV infection. In particular, RSV F was shown to interact with  
57 the TLR4/CD14/MD2 complex, thereby initiating a signalling cascade leading to the  
58 induction of pro-inflammatory cytokines(3–5).

59 In infants hospitalised with RSV bronchiolitis TLR4 was shown to be upregulated on  
60 peripheral blood monocytes during the acute phase of the disease(6). However, the  
61 role of TLR4 in RSV infection and immunopathogenesis remains controversial. Some  
62 studies in mice demonstrated a TLR4-dependent innate immune response following  
63 RSV infection(3, 4, 7). Other studies in cell lines expressing human TLR4, however,  
64 reported that TLR4 did not play a significant role in RSV entry or NF- $\kappa$ B activation(8).  
65 The p38 MAPK pathway, which is downstream of TLR4, was implicated in RSV  
66 replication and was also shown to be involved in the expression of TLR4 near the site

67 of infection. Furthermore, inhibition of TLR4 resulted in a decrease in p38 MAPK  
68 activity(9).

69 We previously described well-differentiated primary pediatric bronchial epithelial cell  
70 (WD-PBEC) cultures that replicated many morphological and physiological hallmarks  
71 of bronchial epithelium *in vivo*, including ciliated epithelium and mucus producing  
72 goblet cells(10). Airway epithelium is the primary target for RSV infection *in vivo* (11).  
73 Importantly, we also demonstrated that RSV infection of WD-PBECs reproduces  
74 several hallmarks of RSV infection in infants. To date, much of the research to  
75 elucidate pathways leading to the induction of pro-inflammatory chemokines and  
76 cytokines following RSV infection has focused on the use of continuous cell lines or  
77 semi-permissive animal models. WD-PBECs evidently provide a more biologically  
78 relevant model in which to study innate immune responses to RSV infection of the  
79 human airway epithelium.

80 Our aim was to exploit our WD-PBEC model to investigate the role of TLR4 in RSV  
81 infection, the induction of type III IFNs, specifically IFN- $\lambda$ 1, and the production of pro-  
82 inflammatory chemokines by using specific inhibitors of TLR4 or downstream  
83 components of this pathway. CLI-095 is a potent and highly specific inhibitor of TLR4  
84 signalling. It binds to Cys747 in the TLR4 intracellular domain but does not inhibit the  
85 binding of ligands to TLR4. CLI-095 binding disrupts the interaction of TLR4 with  
86 adaptor molecules, such as MyD88(12). We also exploited inhibitors of NF- $\kappa$ B (JSH-  
87 23), p38MAPK (SB203580), PI3K (LY294002), and MEK1/2 (U0126) to dissect  
88 signalling pathways implicated in RSV infection/replication and innate immune  
89 response induction.

90 We demonstrated that the intracellular signalling mediated by the TLR4 complex was  
91 involved in RSV infection/replication in WD-PBECs and initiated downstream innate  
92 immune responses, including type III IFNs and pro-inflammatory chemokines. p38  
93 MAPK signalling was also implicated in RSV replication. Our data demonstrated that  
94 inhibition of TLR4 signalling decreases RSV-induced IFN- $\lambda$ 1 secretion. Furthermore,  
95 inhibition of p38 MAPK or NF- $\kappa$ B resulted in a reduction in RSV-induced IFN- $\lambda$ 1  
96 secretion. As NF- $\kappa$ B inhibition did not affect RSV replication kinetics but diminished  
97 IFN- $\lambda$ 1 secretion, our data are consistent with an NF- $\kappa$ B-dependent mechanism of  
98 IFN- $\lambda$ 1 induction following RSV infection.

99

## 100 **Results**

101 To determine whether TLR4 influences RSV infection, HEK293 cells stably  
102 transfected with TLR4 or control HEK293/null cells were infected with RSV A2/eGFP  
103 (MOI~0.1). HEK293 cells do not endogenously express TLR4 (Figure 1A). The  
104 extent of eGFP fluorescence in the monolayers was used as a surrogate for the level  
105 of RSV infection. The kinetics and peak of eGFP spread throughout the monolayers  
106 was significantly higher in HEK293/TLR4 than in the HEK293/null cells, indicating  
107 that the presence of TLR4 increased the susceptibility of these cells to RSV infection  
108 (Figure 1B). We used CLI-095, a highly selective TLR4 signalling blocker, to  
109 investigate if it was the presence of TLR4 on the cell surface or the subsequent  
110 signalling cascade that was involved in the increase in RSV infection. CLI-095 does  
111 not affect ligand binding to TLR4 but inhibits all downstream signalling following  
112 TLR4 activation. CLI-095 (10  $\mu$ g/mL) treatment of HEK293/TLR4 cells significantly  
113 reduced RSV growth kinetics compared to untreated HEK293/TLR4 controls, as

114 evidenced by eGFP fluorescence spread over time. At 48 hpi there was a significant  
115 difference between the level of eGFP expression in HEK293/null cells compared to  
116 HEK293/TLR4 ( $p=0.006$ ) and HEK/TLR4 cells compared to HEK293/TLR4 vs  
117 HEK293/TLR4 + CLI-095 ( $p=0.0152$ ). Similarly, at 72 hpi there was a significant  
118 difference between HEK293/null cells and HEK293/TLR4 ( $p<0.0001$ ) and HEK/TLR4  
119 compared to HEK293/TLR4 + CLI-095 ( $p=0.0003$ ). In contrast, CLI-095 treatment of  
120 HEK293/null did not affect the spread of RSV infection, which was considerably  
121 lower than non-treated HEK293/TLR4 controls (Figure 1B).

122 To confirm whether these data were reproducible in a more physiologically relevant  
123 infection model, we exploited our RSV/WD-PBEC model (13, 14). WD-PBECs were  
124 stained to confirm the presence of TLR4 on the surface of these cells (Figure 2A). WD-  
125 PBECs were treated with varying concentrations of CLI-095 prior to infection with a  
126 low passage clinical isolate of RSV (RSV BT2a) (MOI=0.1). Consistent with the data  
127 from the HEK293/TLR4 cells, a dose-dependent reduction in RSV BT2a growth  
128 kinetics was observed (Figure 2B). The two highest concentrations of CLI-095 (10 and  
129 100  $\mu\text{g}/\text{mL}$ ) resulted in significant reductions in viral titers over the course of the  
130 experiment. At the highest CLI-095 concentration used (100  $\mu\text{g}/\text{mL}$ ) mean RSV titres  
131 peaked at 3.09  $\log_{10}$  compared to 5.05  $\log_{10}$  in untreated controls. At 48, 72 and 96 hpi  
132 pre-treatment with 10 or 100  $\mu\text{g}/\text{mL}$  CLI-095 resulted in a significant reduction in viral  
133 titres compared to the untreated infected controls.

134 Type III IFNs, in particular IFN- $\lambda$ 1, are the main interferons secreted following RSV  
135 infection (15). However, the mechanisms by which RSV induces type III IFN  
136 expression in epithelial cells is poorly understood. Evidence suggests that TLR4 may  
137 be implicated in the induction of type III IFNs following cell stimulation with house dust  
138 mite allergens (16). As the RSV F protein was shown to interact with the

139 TLR4/CD14/MD2 complex(8), we hypothesised that type III IFN induction following  
140 RSV infection was triggered following activation of the TLR4 pathway. To address  
141 this, the basolateral medium from CLI-095-pre-treated RSV BT2a-infected WD-  
142 PBECs was harvested from 72 to 120 hpi and the concentration of IFN- $\lambda$ 1 was  
143 determined. Treatment with both 10 and 100  $\mu$ g/mL CLI-095 resulted in substantial  
144 reductions in IFN- $\lambda$ 1 secretions (Figure 2C) over the course of the experiment. There  
145 was a significant reduction in IFN- $\lambda$ 1 secretion following pre-treatment with 10 or 100  
146  $\mu$ g/mL CLI-095 at each time point, with the exception of 10  $\mu$ g/mL at 72 hpi ( $p=0.0549$ ).  
147 However, these CLI-095 concentrations also resulted in significant reductions in virus  
148 growth kinetics. If virus replication was essential for IFN- $\lambda$ 1 expression, inhibition of  
149 RSV infection/replication, rather than TLR4 signalling per se, might therefore explain  
150 the reduction in IFN- $\lambda$ 1 secretion.

151 To determine if the observed inhibition of RSV growth kinetics or IFN- $\lambda$ 1 production  
152 was dependent on specific TLR4 pathway intermediates, small molecule inhibitors  
153 directed against specific targets were used. WD-PBECs were treated with inhibitors  
154 for PI3K (LY294002), MEK1/2 (U0126), p38 MAPK (SB203580) or NF- $\kappa$ B (JSH-23),  
155 or DMSO as a control. Following infection with RSV BT2a, viral titers in apical rinses  
156 were quantified every 24 h until 96 hpi (Figure 3A). Inhibition of p38 MAPK resulted in  
157 a small but significant decrease in viral growth kinetics compared to the DMSO control.  
158 Conversely, MEK1/2 inhibition resulted in a significant increase in viral titers. Basal  
159 medium from these experiments was harvested and IFN- $\lambda$ 1 was quantified by ELISA.  
160 Significant decreases in IFN- $\lambda$ 1 concentrations were observed following inhibition of  
161 either p38MAPK or NF- $\kappa$ B (Figure 3B). In contrast, the significant increases in RSV  
162 growth kinetics evident following MEK1/2 inhibition did not result in concomitant  
163 increases in IFN- $\lambda$ 1 secretions. Interestingly, the only condition under which the IFN-

164  $\lambda$ 1 concentration was significantly impacted without altering viral titers was NF- $\kappa$ B  
165 inhibition, indicating that NF- $\kappa$ B plays an important role in RSV-induced IFN- $\lambda$ 1  
166 induction.

167 RSV pathogenesis is mediated in large part by the pro-inflammatory immune  
168 responses to infection. Evidence suggests that the production of several chemokines,  
169 including IL-6 and CXCL8/IL-8, correlate with the severity of RSV disease in  
170 infants(17–20). To determine the consequences of TLR4 inhibition on RSV-induced  
171 chemokine secretion levels, WD-PBECs were pre-treated with CLI-095 followed by  
172 infection with RSV BT2a. Chemokine concentrations were determined in basal  
173 medium harvested at 48, 72 and 96 hpi. CLI-095 treatment prior to RSV infection  
174 resulted in significant reductions in MCP-1/CCL2, IL-8/CXCL8, IP-10/CXCL10 and IL-  
175 6 secretions in a dose-dependent manner relative to untreated controls (Figure 4).

## 176 **Discussion**

177 Previous publications reported that TLR4 signalling played no significant role in the  
178 entry and/or replication of RSV(8, 21). Surprisingly, our data indicated the contrary.  
179 We found a significant increase in the level of RSV infection in HEK293/TLR4 cells  
180 compared to HEK293/null cells. A number of experimental details may explain this  
181 discrepancy with the work of Marr and Turvey (2012)(8). First, while recombinant RSV  
182 A2 strains expressing eGFP were used in both studies, the *egfp* gene in our virus was  
183 inserted as the 1<sup>st</sup> transcription unit of the RSV genome, while it was inserted between  
184 the RSV *p* and *m* genes in rgRSV. This may have affected the respective virus  
185 replication kinetics in the cells. Second, we followed the spread of infection over a  
186 longer period of time. In the aforementioned manuscript, infection was followed only  
187 until 48 hpi, at which point a trend towards increased RSV spread was evident in



188 HEK293/TLR4 cells compared to HEK/null cells, but it did not reach significance. In  
189 contrast, we demonstrated significant differences at both 48 and 72 hpi in these same  
190 cell lines. Third, we exploited WD-PBECs and a low passage RSV clinical isolate, RSV  
191 BT2a, to confirm the role of TLR4 in RSV infection in a physiologically relevant model.  
192 Indeed, we also demonstrated a  $>2 \log_{10}$  reduction in RSV titers following inhibition of  
193 TLR4 intracellular signalling in WD-PBECs with 100  $\mu\text{g}/\text{mL}$  CLI-095. In contrast, much  
194 of the previous work exploited the use of cell lines that are permissive to RSV infection  
195 and can be easily transfected (8). Unlike our RSV/WD-PBEC model, these cell lines  
196 do not replicate the morphological or physiological complexities of differentiated airway  
197 epithelium, nor the cytopathogenesis of RSV in airway epithelium *in vivo*.

198 CLI-095 does not interfere with the external domain of TLR4. Therefore, we concluded  
199 that the internal portion of the TLR4 complex and/or the downstream signalling is  
200 associated with RSV growth kinetics in WD-PBECs. Our data from both immortalised  
201 cell lines and WD-PBECs indicated that TLR4 is implicated in RSV infection and/or  
202 replication. This is consistent with a recent report demonstrating a protective role of  
203 MEG3, a long noncoding RNA, against RSV infection, which most likely acts through  
204 the inhibition of the TLR4 signalling pathway(22).

205 Interestingly, TLR4 antagonists have been associated with a reduction in titers of other  
206 viruses both *in vitro* and *in vivo*. Indeed, eritoran, which binds to MD2 and prevents  
207 TLR4 activation, decreased viral titers, cytokine production, clinical symptoms and  
208 morbidity in a mouse model of influenza virus infection (23).

209 We demonstrated that CLI-095 possesses substantial prophylactic properties against  
210 RSV infection in our WD-PBEC model. As the inhibitor acts by blocking intracellular  
211 signalling and does not interfere with the extra-cellular domain of TLR4, it is unlikely

212 that CLI-095 interferes with the RSV F/TLR4 interaction. Indeed, li et al demonstrated  
213 that CLI-095 does not interfere with the binding of LPS to TLR4(24). As such,  
214 diminished RSV growth kinetics are unlikely to be due to the blocking of RSV F protein  
215 binding to the TLR4 complex. An association between TLR4 and nucleolin, a putative  
216 RSV co-receptor or entry factor, was recently described(25). Further work is needed  
217 to establish whether CLI-095 impacted the ability of RSV to interact with nucleolin and  
218 thereby, the ability of RSV to infect epithelial cells.

219 The TLR4 pathway, through adaptor proteins MyD88, TRAM and TRIF, was shown to  
220 activate innate immune responses following RSV infection, resulting in the  
221 downstream induction of pro-inflammatory cytokines/chemokines.(26) Although  
222 significant progress has recently been made in understanding the induction and  
223 function of type III IFNs, many questions remain unanswered. It is likely that there is  
224 cross-talk between the type I and type III IFN induction pathways, as well as  
225 compensatory mechanisms and a degree of redundancy between the two(27). As  
226 such, fully elucidating the type III IFN induction pathway has proven complicated. We  
227 demonstrated that pre-treatment of RSV-infected WD-PBECs with JSH-23, an NF- $\kappa$ B  
228 inhibitor, had a significant impact on the secretion of IFN- $\lambda$ 1 without affecting viral  
229 replication. Type III IFN can be induced through both NF- $\kappa$ B-dependent and  
230 independent pathways(28). Our data suggest that the induction of IFN- $\lambda$ 1 following  
231 RSV infection is, in part, due to NF- $\kappa$ B activation. However, JSH-23 treatment did not  
232 completely block IFN- $\lambda$ 1 secretion in response to RSV infection, thereby suggesting  
233 that there are other pathways through which RSV triggers IFN- $\lambda$ 1 induction. We also  
234 observed a reduction in IFN- $\lambda$ 1 secretion levels following pre-treatment with CLI-095  
235 and SB203580, which were concomitant with significant reductions in viral growth  
236 kinetics. It is possible that diminished RSV replication could explain, in part, the

237 decrease in IFN- $\lambda$ 1 secretion. However, the absence of increased IFN- $\lambda$ 1 secretion  
238 following MEK1/2 inhibition, despite significantly increased RSV replication following  
239 U0126 treatment, suggest that RSV replication kinetics alone do not explain IFN- $\lambda$ 1  
240 secretion levels. Further investigation is required to determine whether the reduction  
241 in IFN- $\lambda$ 1 secretion is due to diminished RSV replication or inhibition of TLR4 and/or  
242 p38 MAPK signalling, or both.

243 There is strong evidence to suggest that RSV pathogenesis is immune mediated(29–  
244 33). Higher concentrations of IL-6 and IL-8/CXCL8 in stimulated cord blood of infants  
245 is predictive of disease severity(19). Furthermore, DeVincenzo *et al.* correlated  
246 symptom scores with IL-6 and IL-8/CXCL8 secretion levels and with viral load in a  
247 human adult challenge model of RSV disease.(34). Our data demonstrated a reduction  
248 in both viral titers and proinflammatory chemokine production following CLI-095 pre-  
249 treatment. At the highest CLI-095 concentration used (100  $\mu$ g/mL) there was a >2 log<sub>10</sub>  
250 reduction in mean RSV titers compared to untreated controls. This reduction in viral  
251 replication coincided with a massive reduction in IP-10/CXCL10, MCP-1/CCL2 and IL-  
252 6 secretions and a significant reduction in IL-8/CXCL8. As these chemokines are  
253 implicated in RSV pathogenesis, our data are consistent with the concept that  
254 restricting RSV replication in infants to a level that poorly stimulates their secretion will  
255 alter the disease outcome, thereby providing the rationale for RSV prophylactics or  
256 early intervention therapeutics.

257 In conclusion, intra-cellular signalling mediated by the TLR4 complex was involved in  
258 the replication of RSV in WD-PBECs and initiated downstream innate immune  
259 responses, including type III IFNs and pro-inflammatory chemokines. Importantly, the  
260 TLR4 inhibitor, CLI-095 (or other similar molecules), may have potential as a RSV  
261 prophylactic, while our data provides the rationale for exploring its therapeutic potential

262 against RSV in WD-PBECs. p38 MAPK signalling is also implicated in RSV replication.  
263 Our data demonstrated that inhibition of TLR4 signalling decreases RSV-induced IFN-  
264  $\lambda$ 1 secretion. While the type III IFN induction pathway following RSV infection remains  
265 to be fully elucidated, our data demonstrated that both NF- $\kappa$ B and p38 MAPK are  
266 implicated. Increasing our understating of the innate immune responses to RSV will  
267 aid in the development of RSV prophylactics, therapeutics and vaccines.

268

## 269 **Materials & Methods**

270 **Cell lines and viruses:** The origin and characterization of the clinical isolate RSV  
271 BT2a were previously described (35). Recombinant RSV expressing eGFP (rRSV  
272 A2/eGFP) was a kind gift from Prof. Ralph Tripp (University of Georgia) and Prof.  
273 Michael Teng (University of South Florida). Its generation was previously described  
274 (36–38). The origin and characterization of the recent clinical isolate RSV BT2a were  
275 previously described(39). RSV titers in biological samples were determined as  
276 previously described(40). HEK293/TLR4 and HEK293/null cells were obtained from  
277 Invivogen and grown in DMEM (4.5 g/L glucose) supplemented with 10% HI-FBS.  
278 Cells were kept under selective pressure using blasticidin (Sigma Aldrich). HEK cells  
279 were infected for 2 h at 37°C in DMEM (4.5 g/L glucose, 0% FBS) then maintained in  
280 serum-free DMEM (4.5 g/L glucose).

281 **WD-PBEC cultures:** Passage 1 primary paediatric bronchial epithelial cells (PBECs)  
282 were obtained commercially (Lonza). WD-PBEC cultures were generated as  
283 described previously(14) . Complete differentiation took a minimum of 21 days.  
284 Cultures were only used when hallmarks of excellent differentiation were evident,  
285 including, no holes in the cultures, extensive apical coverage with beating cilia, and

286 obvious mucus production. WD-PBECs were infected apically for 2 h at 37°C. For  
287 apical rinses of WD-PBECs during experimentation low glucose DMEM was added  
288 apically (200 µL) and left for 5 min at room temperature (RT). This was aspirated  
289 without damaging the cultures, added to cryovials and snap frozen in liquid nitrogen.  
290 At specified intervals post-treatment and/or infection basolateral medium was also  
291 harvested and snap frozen in liquid nitrogen, and replaced with fresh medium.

292 **Immunofluorescence:** HEK293/null, HEK293/TLR4 cells and WD-PBECs were fixed  
293 with 4% PFA (v/v in PBS) for 40 mins then permeabilised with 0.1% Triton X-100 (v/v  
294 in PBS) for 1 h. Cells were blocked with 0.4% BSA (v/v in PBS) for 30 mins then  
295 incubated with anti-TLR4 antibody (Santa Cruz) overnight at 4°C. Following washing,  
296 cells were incubated with goat anti-rabbit AlexaFluor 488 antibody for 1 h at 37°C.  
297 Cultures were mounted with DAPI mounting medium (Vectashield, Vector Labs) and  
298 imaged using a Nikon Eclipse 90i.

299 **Signalling inhibitors:** All of the inhibitors were reconstituted in DMSO (Sigma  
300 Aldrich) as per the manufacturers' instructions. Concentrations of all inhibitors used  
301 for these experiments were at least double the IC<sub>50</sub> (inhibitory concentration 50%)  
302 indicated by the manufacturer. Stocks were diluted in ALI medium to achieve the  
303 working concentration. WD-PBECs were pre-treated apically at 37°C for the time  
304 indicated in figure legends.

305 The inhibitors used were:

- 306 (i) CLI-095 (Source Bioscience), a TLR4 inhibitor that blocks the intracellular  
307 signalling, but not the extracellular domain. Concentrations used are stated  
308 in individual figure legends.
- 309 (ii) LY294002 (50 µM) (LC labs), a PI3K reversible inhibitor that inhibits  
310 Akt/PKB signalling. It also inhibits cell proliferation and induces apoptosis.

311 (iii) U0126 (20  $\mu$ M) (LC labs), a highly selective inhibitor of MEK1/2. Acts by  
312 disrupting the transcriptional activity of AP-1 and blocks the downstream  
313 induction of cytokines and MMPs.

314 (iv) SB203580 (1  $\mu$ M) (Sigma Aldrich), a p38 MAPK inhibitor that also blocks  
315 PBK phosphorylation and total SAPK/JNK activity. At high concentrations it  
316 has been shown to activate the ERK pathway and lead to an increase in  
317 NF- $\kappa$ B activity.

318 (v) JSH-23 (20  $\mu$ M) (Sigma Aldrich), is an NF- $\kappa$ B inhibitor. It has also been  
319 shown, under certain conditions, to inhibit apoptotic chromatin condensation  
320 and NO production.

321 **IFN- $\lambda$ 1 quantification:** IFN- $\lambda$ 1 ELISA kits were purchased from eBioscience (Ready  
322 to use Platinum Sandwich ELISA kit). IFN- $\lambda$ 1 was quantified from basolateral medium  
323 harvested from WD-PBECs, following the manufacturer's instructions. Frozen aliquots  
324 of basolateral medium were rapidly defrosted in a water bath at 37°C and kept on ice  
325 during the ELISA procedure to minimise degradation.

326 **Chemokine quantification:** ProcartaPlex kits were purchased from eBioscience to  
327 measure a panel of chemokines present in basolateral medium. The manufacturer's  
328 protocol was followed throughout. Analytes measured included IP-10/CXCL10, IL-  
329 8/CXCL8, IL-6, and MCP-1/CCL2.

330 **Image analysis:** Image analysis was carried out using ImageJ software  
331 (<http://rsbweb.nih.gov/ij/>). A minimum of 5 fields were captured per condition/well by  
332 UV microscopy (Nikon TE-2000U and Hammamatsu Orca-ER camera).

333

334 **Statistical analysis:** GraphPad Prism<sup>®</sup> was used to create graphical  
335 representations of the data and for statistical analyses. Summary measures over

336 time were compared by calculating the areas under the curves (AUC) and we used  
337 t tests to calculate if these AUCs were statistically significantly different. Differences  
338 were also assessed by unadjusted t tests at each time point.  
339  $p < 0.05$  was considered significant.

340 \* p value =  $< 0.05$ ; \*\* p value =  $< 0.01$ ; \*\*\* p value =  $< 0.001$ .

341

342

### 343 **References**

- 344 1. Nair H, Brooks WA, Katz M, Roca A, Berkley JA, Madhi SA, Simmerman JM,  
345 Gordon A, Sato M, Howie S, Krishnan A, Ope M, Lindblade KA, Carosone-Link  
346 P, Lucero M, Ochieng W, Kamimoto L, Dueger E, Bhat N, Vong S,  
347 Theodoratou E, Chittaganpitch M, Chimah O, Balmaseda A, Buchy P, Harris  
348 E, Evans V, Katayose M, Gaur B, O'Callaghan-Gordo C, Goswami D, Arvelo  
349 W, Venter M, Briese T, Tokarz R, Widdowson M-A, Mounts AW, Breiman RF,  
350 Feikin DR, Klugman KP, Olsen SJ, Gessner BD, Wright PF, Rudan I, Broor S,  
351 Simões EAF, Campbell H. 2011. Global burden of respiratory infections due to  
352 seasonal influenza in young children: a systematic review and meta-analysis.  
353 *Lancet* 378:1917–30.
- 354 2. Lotz MT, Peebles RS. 2012. Mechanisms of respiratory syncytial virus  
355 modulation of airway immune responses. *Curr Allergy Asthma Rep* 12:380–7.
- 356 3. Haynes LM, Moore DD, Kurt-Jones EA, Finberg RW, Anderson LJ, Tripp RA.  
357 2001. Involvement of toll-like receptor 4 in innate immunity to respiratory  
358 syncytial virus. *J Virol* 75:10730–7.
- 359 4. Kurt-Jones EA, Popova L, Kwinn L, Haynes LM, Jones LP, Tripp RA, Walsh

- 360 EE, Freeman MW, Golenbock DT, Anderson LJ, Finberg RW. 2000. Pattern  
361 recognition receptors TLR4 and CD14 mediate response to respiratory  
362 syncytial virus. *Nat Immunol* 1:398–401.
- 363 5. Rallabhandi P, Bell J, Boukhvalova MS, Medvedev A, Lorenz E, Arditi M,  
364 Hemming VG, Blanco JCG, Segal DM, Vogel SN. 2006. Analysis of TLR4  
365 polymorphic variants: new insights into TLR4/MD-2/CD14 stoichiometry,  
366 structure, and signaling. *J Immunol* 177:322–32.
- 367 6. Gagro A, Tominac M, Krsulović-Hresić V, Baće A, Matić M, Drazenović V,  
368 Mlinarić-Galinović G, Kosor E, Gotovac K, Bolanca I, Batinica S, Rabatić S.  
369 2004. Increased Toll-like receptor 4 expression in infants with respiratory  
370 syncytial virus bronchiolitis. *Clin Exp Immunol* 135:267–72.
- 371 7. Haeberle HA, Takizawa R, Casola A, Brasier AR, Dieterich H-J, Van Rooijen  
372 N, Gatalica Z, Garofalo RP. 2002. Respiratory syncytial virus-induced  
373 activation of nuclear factor-kappaB in the lung involves alveolar macrophages  
374 and toll-like receptor 4-dependent pathways. *J Infect Dis* 186:1199–206.
- 375 8. Marr N, Turvey SE. 2012. Role of human TLR4 in respiratory syncytial virus-  
376 induced NF- $\kappa$ B activation, viral entry and replication. *Innate Immun* 18:856–  
377 865.
- 378 9. Marchant D, Singhera GK, Utokaparch S, Hackett TL, Boyd JH, Luo Z, Si X,  
379 Dorscheid DR, McManus BM, Hegele RG. 2010. Toll-Like Receptor 4-  
380 Mediated Activation of p38 Mitogen-Activated Protein Kinase Is a Determinant  
381 of Respiratory Virus Entry and Tropism. *J Virol* 84:11359–11373.
- 382 10. Villenave R, Thavagnanam S, Sarlang S, Parker J, Douglas I, Skibinski G,  
383 Heaney LG, McKaigue JP, Coyle P V, Shields MD, Power UF. 2012. In vitro



- 384 modeling of respiratory syncytial virus infection of pediatric bronchial  
385 epithelium, the primary target of infection in vivo. *Proc Natl Acad Sci U S A*  
386 109:5040–5.
- 387 11. Zhang L, Peebles ME, Boucher RC, Collins PL, Pickles RJ. 2002. Respiratory  
388 syncytial virus infection of human airway epithelial cells is polarized, specific to  
389 ciliated cells, and without obvious cytopathology. *J Virol* 76:5654–66.
- 390 12. Matsunaga N, Tsuchimori N, Matsumoto T, li M. 2011. TAK-242 (resatorvid), a  
391 small-molecule inhibitor of Toll-like receptor (TLR) 4 signaling, binds  
392 selectively to TLR4 and interferes with interactions between TLR4 and its  
393 adaptor molecules. *Mol Pharmacol* 79:34–41.
- 394 13. Villenave R, Touzelet O, Thavagnanam S, Sarlang S, Parker J, Skibinski G,  
395 Heaney LG, McKaigue JP, Coyle P V, Shields MD, Power UF. 2010.  
396 Cytopathogenesis of Sendai virus in well-differentiated primary pediatric  
397 bronchial epithelial cells. *J Virol* 84:11718–28.
- 398 14. Broadbent L, Villenave R, Guo-Parke H, Douglas I, Shields MD, Power UF.  
399 2016. In Vitro Modeling of RSV Infection and Cytopathogenesis in Well-  
400 Differentiated Human Primary Airway Epithelial Cells (WD-PAECs)., p. 119–  
401 39. *In Methods in molecular biology* (Clifton, N.J.).
- 402 15. Villenave R, Broadbent L, Douglas I, Lyons JD, Coyle P V., Teng MN, Tripp  
403 RA, Heaney LG, Shields MD, Power UF. 2015. Induction and Antagonism of  
404 Antiviral Responses in Respiratory Syncytial Virus-Infected Pediatric Airway  
405 Epithelium. *J Virol* 89:12309–12318.
- 406 16. Hammad H, Chieppa M, Perros F, Willart MA, Germain RN, Lambrecht BN.  
407 2009. House dust mite allergen induces asthma via Toll-like receptor 4

- 408 triggering of airway structural cells. *Nat Med* 15:410–6.
- 409 17. McNamara PS, Flanagan BF, Hart CA, Smyth RL. 2005. Production of  
410 chemokines in the lungs of infants with severe respiratory syncytial virus  
411 bronchiolitis. *J Infect Dis* 191:1225–32.
- 412 18. Murai H, Terada A, Mizuno M, Asai M, Hirabayashi Y, Shimizu S, Morishita T,  
413 Kakita H, Hussein MH, Ito T, Kato I, Asai K, Togari H. 2007. IL-10 and  
414 RANTES are elevated in nasopharyngeal secretions of children with  
415 respiratory syncytial virus infection. *Allergol Int* 56:157–63.
- 416 19. Juntti H, Osterlund P, Kokkonen J, Dunder T, Renko M, Pokka T, Julkunen I,  
417 Uhari M. 2009. Cytokine responses in cord blood predict the severity of later  
418 respiratory syncytial virus infection. *J Allergy Clin Immunol* 124:52-58.e1–2.
- 419 20. Tabarani CM, Bonville C a, Suryadevara M, Branigan P, Wang D, Huang D,  
420 Rosenberg HF, Domachowske JB. 2013. Novel inflammatory markers, clinical  
421 risk factors and virus type associated with severe respiratory syncytial virus  
422 infection. *Pediatr Infect Dis J* 32:e437-42.
- 423 21. Lizundia R, Sauter K-S, Taylor G, Werling D. 2008. Host species-specific  
424 usage of the TLR4-LPS receptor complex. *Innate Immun* 14:223–31.
- 425 22. Tao X, Zeng L, Wang H, Liu H. 2017. LncRNA MEG3 ameliorates respiratory  
426 syncytial virus infection by suppressing TLR4 signaling. *Mol Med Rep*  
427 17:4138–4144.
- 428 23. Shirey KA, Lai W, Scott AJ, Lipsky M, Mistry P, Pletneva LM, Karp CL,  
429 McAlees J, Gioannini TL, Weiss J, Chen WH, Ernst RK, Rossignol DP,  
430 Gusovsky F, Blanco JCG, Vogel SN. 2013. The TLR4 antagonist Eritoran  
431 protects mice from lethal influenza infection. *Nature* 497:498–502.

- 432 24. li M, Matsunaga N, Hazeki K, Nakamura K, Takashima K, Seya T, Hazeki O,  
433 Kitazaki T, Iizawa Y. 2006. A novel cyclohexene derivative, ethyl (6R)-6-[N-(2-  
434 Chloro-4-fluorophenyl)sulfamoyl]cyclohex-1-ene-1-carboxylate (TAK-242),  
435 selectively inhibits toll-like receptor 4-mediated cytokine production through  
436 suppression of intracellular signaling. *Mol Pharmacol* 69:1288–95.
- 437 25. Yuan X, Hu T, He H, Qiu H, Wu X, Chen J, Wang M, Chen C, Huang S. 2018.  
438 Respiratory syncytial virus prolifically infects N2a neuronal cells, leading to  
439 TLR4 and nucleolin protein modulations and RSV F protein co-localization with  
440 TLR4 and nucleolin. *J Biomed Sci* 25:13.
- 441 26. Zhou Y, Yang J, Deng H, Xu H, Zhang J, Jin W, Gao H, Liu F, Zhao D. 2014.  
442 Respiratory syncytial virus infection modulates interleukin-8 production in  
443 respiratory epithelial cells through a transcription factor-activator protein-1  
444 signaling pathway. *Mol Med Rep* 10:1443–7.
- 445 27. Ioannidis I, Ye F, McNally B, Willette M, Flaño E. 2013. Toll-like receptor  
446 expression and induction of type I and type III interferons in primary airway  
447 epithelial cells. *J Virol* 87:3261–70.
- 448 28. Thomson SJP, Goh FG, Banks H, Krausgruber T, Kottenko S V, Foxwell BMJ,  
449 Udalova IA. 2009. The role of transposable elements in the regulation of IFN-  
450 lambda1 gene expression. *Proc Natl Acad Sci U S A* 106:11564–9.
- 451 29. Selvaggi C, Pierangeli A, Fabiani M, Spano L, Nicolai A, Papoff P, Moretti C,  
452 Midulla F, Antonelli G, Scagnolari C. 2014. Interferon lambda 1-3 expression in  
453 infants hospitalized for RSV or HRV associated bronchiolitis. *J Infect* 68:467–  
454 77.
- 455 30. Moreno-Solís G, Torres-Borrego J, de la Torre-Aguilar MJ, Fernández-

- 456           Gutiérrez F, Llorente-Cantarero FJ, Pérez-Navero JL. 2014. Analysis of the  
457           local and systemic inflammatory response in hospitalized infants with  
458           respiratory syncytial virus bronchiolitis. *Allergol Immunopathol (Madr)*.
- 459    31.    Díaz P V, Gaggero AA, Pinto RA, Mamani R, Uasapud PA, Bono MR. 2013.  
460           Aumento de interleuquinas proinflamatorias y de cortisol plasmático en  
461           bronquiolitis por virus respiratorio sincicial: relación con la gravedad de la  
462           infección. *Rev Med Chil* 141:574–581.
- 463    32.    Tapia LI, Ampuero S, Palomino MA, Luchsinger V, Aguilar N, Ayarza E,  
464           Mamani R, Larrañaga C. 2013. Respiratory syncytial virus infection and  
465           recurrent wheezing in Chilean infants: a genetic background? *Infect Genet*  
466           *Evol* 16:54–61.
- 467    33.    García C, Soriano-Fallas A, Lozano J, Leos N, Gomez AM, Ramilo O, Mejias  
468           A. 2012. Decreased innate immune cytokine responses correlate with disease  
469           severity in children with respiratory syncytial virus and human rhinovirus  
470           bronchiolitis. *Pediatr Infect Dis J* 31:86–9.
- 471    34.    DeVincenzo JP, Wilkinson T, Vaishnav A, Cehelsky J, Meyers R, Nochur S,  
472           Harrison L, Meeking P, Mann A, Moane E, Oxford J, Pareek R, Moore R,  
473           Walsh E, Studholme R, Dorsett P, Alvarez R, Lambkin-Williams R. 2010. Viral  
474           load drives disease in humans experimentally infected with respiratory  
475           syncytial virus. *Am J Respir Crit Care Med* 182:1305–14.
- 476    35.    Villenave R, O'Donoghue D, Thavagnanam S, Touzelet O, Skibinski G,  
477           Heaney LG, McKaigue JP, Coyle P V, Shields MD, Power UF. 2011.  
478           Differential cytopathogenesis of respiratory syncytial virus prototypic and  
479           clinical isolates in primary pediatric bronchial epithelial cells. *Viol J* 8:43.

- 480 36. Techaarpornkul S, Barretto N, Peeples ME. 2001. Functional analysis of  
481 recombinant respiratory syncytial virus deletion mutants lacking the small  
482 hydrophobic and/or attachment glycoprotein gene. *J Virol* 75:6825–34.
- 483 37. Collins PL, Hill MG, Camargo E, Grosfeld H, Chanock RM, Murphy BR. 1995.  
484 Production of infectious human respiratory syncytial virus from cloned cDNA  
485 confirms an essential role for the transcription elongation factor from the 5'  
486 proximal open reading frame of the M2 mRNA in gene expression and  
487 provides a capability for vaccine . *Proc Natl Acad Sci U S A* 92:11563–7.
- 488 38. Ling Z, Tran KC, Teng MN. 2009. Human respiratory syncytial virus  
489 nonstructural protein NS2 antagonizes the activation of beta interferon  
490 transcription by interacting with RIG-I. *J Virol* 83:3734–42.
- 491 39. Villenave R, O'Donoghue D, Thavagnanam S, Touzelet O, Skibinski G,  
492 Heaney LG, McKaigue JP, Coyle P V, Shields MD, Power UF. 2011.  
493 Differential cytopathogenesis of respiratory syncytial virus prototypic and  
494 clinical isolates in primary pediatric bronchial epithelial cells. *Virology* 438:43–51.
- 495 40. Power UF, Plotnicky-Gilquin H, Huss T, Robert A, Trudel M, Stahl S, Uhlen M,  
496 Nguyen TN, Binz H. 1997. Induction of protective immunity in rodents by  
497 vaccination with a prokaryotically expressed recombinant fusion protein  
498 containing a respiratory syncytial virus G protein fragment. *Virology* 230:155–  
499 166.

## 502 Figure Legends

503

504 Figure 1. To confirm the presence/absence of TLR4 HEK293 cells stably transfected with  
505 TLR4 or null control cells were fixed using 4% PFA (v/v in PBS) then permeabilised using  
506 0.1% Triton X-100 (v/v in PBS) for 1 h. Cells were incubated with anti-TLR4 antibody (Santa  
507 Cruz) followed by a green secondary antibody (AlexaFluor) (A). HEK293/null and  
508 HEK293/TLR4 cells were treated with 10 µg/mL CLI-095 or mock treated for 6 h then infected  
509 (in duplicate) with RSV/eGFP at an MOI=0.1. Five images per well were captured at 24, 48  
510 and 72 hpi using a Nikon TE2000U microscope. The % of the image expressing green  
511 fluorescence was assessed using Image J. The average of the 5 fields of view per well was  
512 calculated (B). The data were derived from 2 independent experiments carried out in duplicate.  
513 Vertical dotted lines indicate statistical significance when areas under the curves were  
514 calculated and compared (\*\* p value = <0.01; \*\*\* p value = <0.001). Differences were also  
515 assessed by t test at each time point.

516

517

518 Figure 2. To confirm the presence of TLR4 on WD-PBECs uninfected cultures were fixed using  
519 4% PFA (v/v in PBS) permeabilised then using 0.1% Triton X-100 (v/v in PBS) for 1 h. Cells  
520 were incubated with anti-TLR4 antibody (Santa Cruz) followed by a green secondary antibody  
521 (AlexaFluor) (A). WD-PBECs (n=3 donors, duplicate Transwells for each condition), pre-  
522 treated apically with 1, 10 or 100 µg/mL CLI-095 or untreated, were infected with RSV BT2a  
523 (MOI=0.1). Apical washes were harvested every 24 h following infection up to 96 hpi; 200 µL  
524 DMEM (with no additives) was incubated on the apical surface for 5 min at RT, removed and  
525 snap frozen in liquid nitrogen. Basal medium was also harvested every 24 h. Apical washes  
526 were titrated on HEp-2 cells to determine virus growth kinetics (B). IFN-λ1 in basolateral  
527 medium from wells, pre-treated with 10 or 100 µg/mL CLI-095 or untreated at 72, 96 and 120  
528 hpi, was quantified by ELISA (eBioscience) (C). Vertical dotted lines indicate statistical

529 significance when areas under the curves were calculated and compared (\*\* p value = <0.01;  
530 \*\*\* p value = <0.001). Statistical significance between conditions was also assessed at each  
531 time point.

532

533

534 Figure 3. WD-PBECs (n=3 donors) were pre-treated apically with LY294002 (PI3K inhibitor),  
535 U0126 (MEK1/2 inhibitor), SB203580 (p38MAPK inhibitor), JSH-23 (NF-κB inhibitor), or  
536 DMSO (used as a control) for 1 h at 37°C prior to infection with RSV BT2a (MOI=0.1). Apical  
537 washes were harvested every 24 h following infection and titrated on HEp-2 cells to determine  
538 virus growth kinetics (A). Basolateral medium was harvested and replaced with fresh medium  
539 every 24 h. IFN-λ1 in basolateral medium harvested at 48, 72, 96 and 120 hpi was quantified  
540 by ELISA (eBioscience) (B). Vertical dotted lines indicate statistical significance when areas  
541 under the curves were calculated and compared \* p value = <0.05; \*\* p value = <0.01).

542

543

544 Figure 4. WD-PBECs (n=3 donors), pre-treated apically with 10 or 100 µg/mL CLI-095 or  
545 untreated, were infected with RSV BT2a at an MOI=0.1. Basolateral medium was harvested  
546 and replaced with fresh medium every 24 h. The concentration of MCP-1/CCL2, IP-  
547 10/CXCL10, IL-6 and IL-8/CXCL8 in basolateral medium was measured by BioPlex  
548 (eBioscience) at 48, 72 and 96 hpi. Vertical dotted lines indicate statistical significance when  
549 areas under the curves were calculated and compared \* p value = <0.05; \*\* p value =  
550 <0.01).

FIG 1

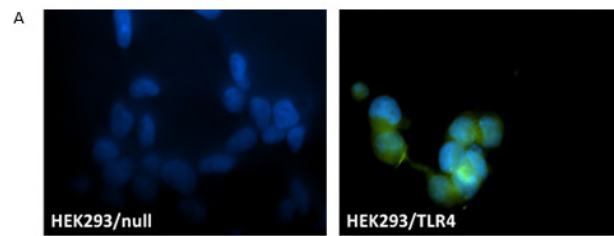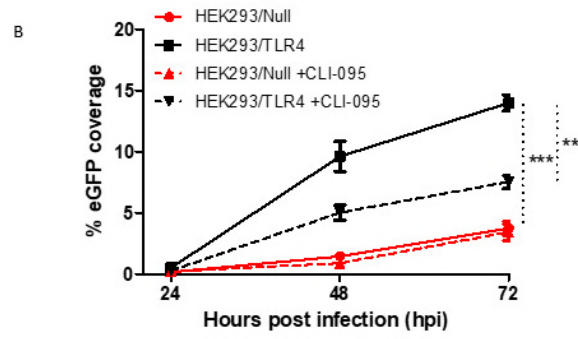



FIG 2

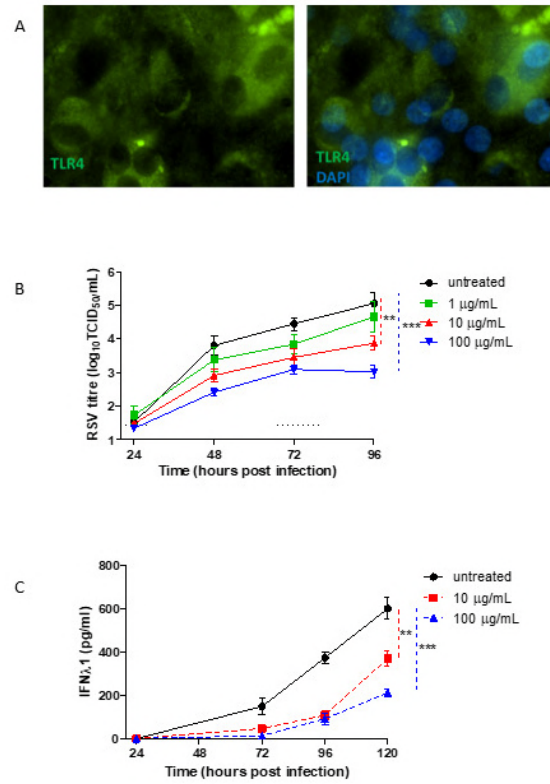

FIG 3

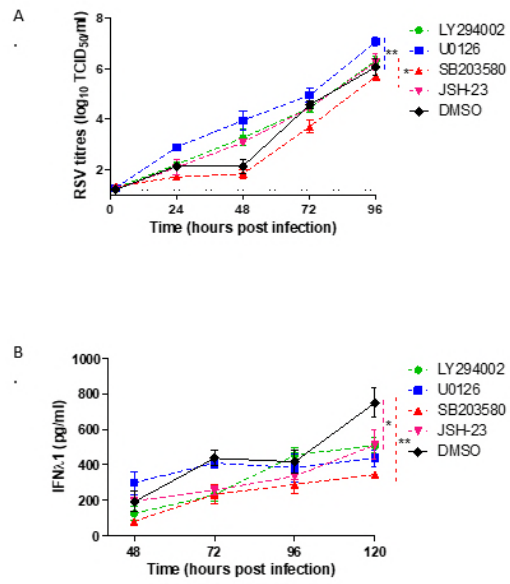

FIG 4

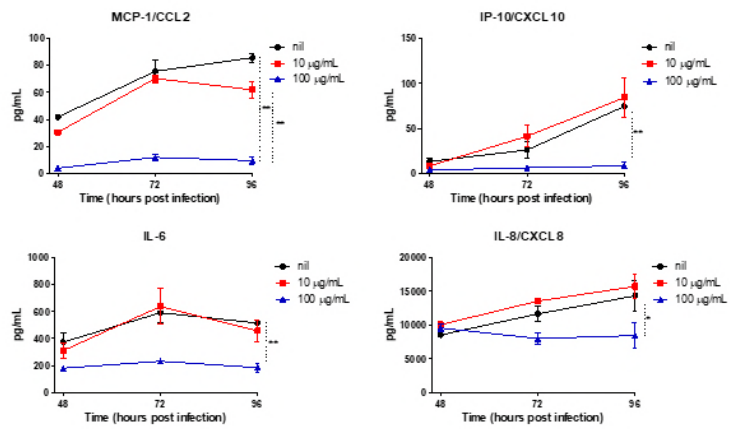

Source: http://biorxiv.org/content/10.1101/404384v1.full.pdf
